# Supplementary material for: Metabolite, immunocyte phenotype, and lymphoma: a Mendelian randomization study
Source: Front Immunol. 2024 Sep 25;15:1431261. doi: 10.3389/fimmu.2024.1431261 (PMC11461196; doi:10.3389/fimmu.2024.1431261)
Supplement: Supplementary file 10 [file Table9.xlsx]

## Sheet: Sheet1
Metabolite	Immune.cell	Outcome	Mediated.effect	Mediated.proportion	p.value
Arginine to glutamate ratio	CD27 on PB/PC	Chronic lymphocytic leukaemia	0.0490(0.0043, 0.0937)	14.600%(1.290%, 28.000%)	0.0316748
X-18922 levels	NK %lymphocyte	Diffuse large B-cell lymphoma	0.0182(0.000128, 0.0363)	-8.940%(-0.063%, -17.800%)	0.0483934
X-24531 levels	CD25 on IgD- CD24-	Diffuse large B-cell lymphoma	-0.0320(-0.0637, -0.00038)	13.200%(26.200%, 0.156%)	0.0473118

## Sheet: Sheet2
exposureTrait	outcomeTrait	method	P-val	OR	95% Cl	Q statistics	Egger intercept	P-intercept
Arginine to glutamate ratio	CD27 on PB/PC	MR Egger	0.124619	1.30401	0.940-1.807	27.8563	-0.00496767	0.794871
		Weighted median	0.0432717	1.21989	1.006-1.479
		Inverse variance weighted	0.00156414	1.25365	1.090-1.442	27.94
		Simple mode	0.21817	1.24339	0.887-1.743
		Weighted mode	0.328659	1.17188	0.858-1.600
CD27 on PB/PC	Chronic lymphocytic leukaemia	MR Egger	0.00807434	1.32098	1.101-1.585	18.555	-0.029343	0.288472
		Weighted median	0.0164129	1.3311	1.054-1.681
		Inverse variance weighted	0.00350894	1.24199	1.074-1.437	19.8655
		Simple mode	0.242439	1.33601	0.835-2.137
		Weighted mode	0.00891424	1.36236	1.108-1.675
Arginine to glutamate ratio	Chronic lymphocytic leukaemia	MR Egger	0.594191	1.20894	0.607-2.406	11.8164	0.0179461	0.649089
		Weighted median	0.0315278	1.5704	1.041-2.370
		Inverse variance weighted	0.0337006	1.3972	1.026-1.902	12.029
		Simple mode	0.176918	1.63717	0.817-3.279
		Weighted mode	0.169699	1.67517	0.820-3.422

## Sheet: Sheet3
exposureTrait	outcomeTrait	method	P-val	OR	95% Cl	Q statistics	Egger intercept	P-intercept
X-18922 levels	NK %lymphocyte	MR Egger	0.136886	0.848576	0.688-1.047	30.5033	0.0063054	0.693137
		Weighted median	0.028049	0.86182	0.755-0.984
		Inverse variance weighted	0.0114046	0.881095	0.799-0.972	30.683
		Simple mode	0.309535	0.887979	0.709-1.112
		Weighted mode	0.0632771	0.848641	0.719-1.002
NK %lymphocyte	Diffuse large B-cell lymphoma	MR Egger	0.0110273	0.839678	0.741-0.951	31.5127	0.0155344	0.476406
		Weighted median	0.0137338	0.861941	0.766-0.970
		Inverse variance weighted	0.00203695	0.866117	0.791-0.949	32.1715
		Simple mode	0.159957	0.881023	0.742-1.046
		Weighted mode	0.0235719	0.869239	0.775-0.974
X-18922 levels	Diffuse large B-cell lymphoma	MR Egger	0.513447	0.878585	0.599-1.289	29.987	-0.0125084	0.671187
		Weighted median	0.516482	0.918847	0.712-1.187
		Inverse variance weighted	0.0247842	0.815898	0.683-0.975	30.1915
		Simple mode	0.301633	0.790702	0.511-1.225
		Weighted mode	0.428441	0.894527	0.681-1.174

## Sheet: Sheet4
exposureTrait	outcomeTrait	method	pval	or	or_lci95	Q statistics	Egger intercept	P-intercept
X-24531 levels	CD25 on IgD- CD24-	MR Egger	0.681981	0.951841	0.754-1.201	23.0904	-0.0221888	0.2296
		Weighted median	0.15066	0.891012	0.761-1.043
		Inverse variance weighted	0.00355265	0.838307	0.745-0.944	24.7739
		Simple mode	0.19288	0.855988	0.682-1.074
		Weighted mode	0.189325	0.889289	0.750-1.054
CD25 on IgD- CD24-	Diffuse large B-cell lymphoma	MR Egger	0.271621	1.14871	0.902-1.462	20.1054	0.00940491	0.68138
		Weighted median	0.0220794	1.24518	1.032-1.503
		Inverse variance weighted	0.00650458	1.19923	1.052-1.367	20.2781
		Simple mode	0.0987676	1.31894	0.961-1.810
		Weighted mode	0.0534247	1.27224	1.008-1.606
X-24531 levels	Diffuse large B-cell lymphoma	MR Egger	0.760599	0.924247	0.560-1.524	12.3781	-0.0249071	0.481125
		Weighted median	0.10021	0.770269	0.564-1.051
		Inverse variance weighted	0.0300946	0.784118	0.629-0.977	12.8926
		Simple mode	0.0801632	0.629909	0.384-1.032
		Weighted mode	0.0789455	0.701186	0.480-1.023
